# Supplementary material for: Edgetic Perturbations Contribute to Phenotypic Variability in PEX26 Deficiency
Source: PubMed Central journal article supplement (PMC8600046; doi:10.3389/fgene.2021.726174), 2021-11-04
Supplement: DataSheet1.pdf [file DataSheet1.pdf]

## Supplementary material

### 1. SUPPLEMENTARY FIGURES

**Supplementary Figure 1** - This figure is related to Fig. 3C and demonstrates the results of BRET analysis as the basis for the determination of binding domains of PEX26 to the newly identified interaction partners.

### 2. SUPPLEMENTARY TABLES

**Supplementary Table 1** - This table is related to the Results section "*Interaction of wild-type and variant PEX26 with PEX6*" and "*PEX26 variant-induced edgetic perturbations of the peroxisomal interactome*" of the main manuscript and provides additional information on genotypes and phenotypes of *PEX26* variants investigated in this study.

**Supplementary Table 2** - This table is related to Fig. 2A and provides the list of genes encoding peroxisomal proteins investigated in this study.

**Supplementary Table 3** - This table relates to Fig. 2C and provides results from OMIM database research and analysis.

**Supplementary Table 4** - This table is related to Fig. 4B and demonstrates the matrix of PPI for WT and variant PEX26 used as a basis for cluster analysis.

**Supplementary Table 5** - This table is related to Fig. 4A and provides parameters of network analysis.

**Supplementary Table 6** - This table is related to Fig. 4C and provides additional information on biochemical phenotype parameters.

### 3. SUPPLEMENTARY REFERENCES

References cited in the supplemental Tables and Experimental Procedures section described above are given.

## SUPPLEMENTARY FIGURES

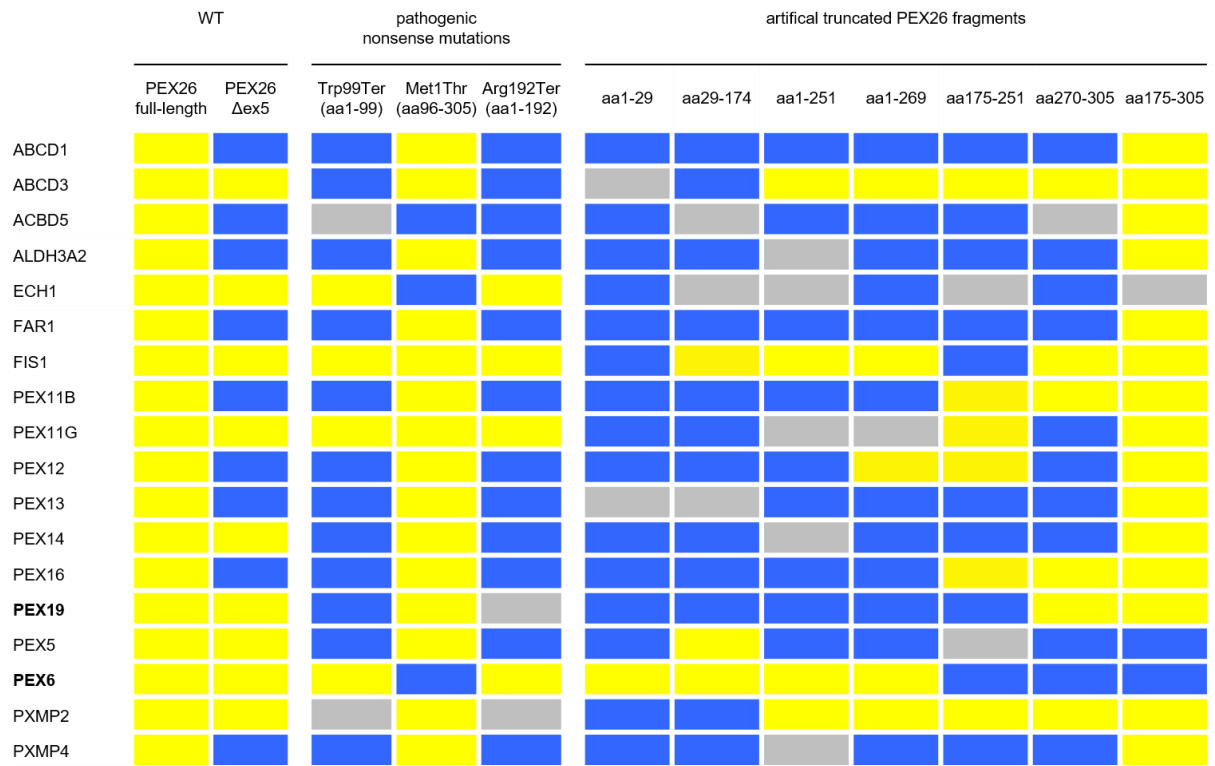

**Supplementary Figure 1. Characterization of PEX26 binding domains to the newly identified interaction partner.** Interaction matrix of full-length PEX26 and truncation constructs analyzed by BRET. Yellow nodes represent a positive interaction in at least one out of eight combinations tested, blue nodes represent negative interactions in all combinations, grey nodes represent those tested combinations that resulted in conflicting assertions.

## SUPPLEMENTARY TABLES

**Supplementary Table 1. Phenotypes and genotypes of *PEX26* variants investigated in this study.**

| Variant             | Biochemical phenotype |                                                | Genotype <sup>‡</sup>                                                                                            | Clinical phenotype <sup>‡</sup> |
|---------------------|-----------------------|------------------------------------------------|------------------------------------------------------------------------------------------------------------------|---------------------------------|
|                     | PEX6 binding*         | Peroxisomal matrix protein import <sup>†</sup> |                                                                                                                  |                                 |
| <i>p</i> .Met1Thr   | < 40%                 | 55%                                            | <i>p</i> .Met1Thr/ <i>p</i> .Leu45Pro                                                                            | IRD                             |
| <i>p</i> .Leu44Pro  | 40-70%                | 0%                                             | <i>p</i> .Leu44Pro/ <i>p</i> .Arg98Trp                                                                           | NALD                            |
| <i>p</i> .Leu45Pro  | 40-70%                | 0%                                             | <i>p</i> .Leu45Pro/ <i>p</i> .Met1Thr                                                                            | IRD                             |
| <i>p</i> .Gly89Arg  | 70-90%                | 0%                                             | <i>p</i> .Gly89Arg/ <i>p</i> .Gly89Arg                                                                           | ZS                              |
| <i>p</i> .Arg98Trp  | 100%                  | 20%                                            | <i>p</i> .Arg98Trp/ <i>p</i> .Arg98Trp                                                                           | NALD                            |
|                     |                       |                                                | <i>p</i> .Arg98Trp/ <i>p</i> .Leu44Pro<br><i>p</i> .Arg98Trp/ <i>p</i> .Ala143_Val182dup+<br><i>p</i> .Gly183Val | NALD<br>IRD                     |
| <i>p</i> .Trp99Ter  | no data available     |                                                |                                                                                                                  |                                 |
| <i>p</i> .Pro117Leu | 40-70%                | 0%                                             | <i>p</i> .Pro117Leu/ <i>p</i> .Leu153Val+<br><i>p</i> .Arg288fs366Ter                                            | IRD                             |
| <i>p</i> .Pro118Arg | no data available     |                                                |                                                                                                                  |                                 |
| <i>p</i> .Leu153Val | 100%                  | 70%                                            | <i>p</i> .Leu153Val+ <i>p</i> .Arg288fs366Ter/<br><i>p</i> .Pro117Leu                                            | IRD                             |
| <i>p</i> .Arg192Ter | no data available     |                                                |                                                                                                                  |                                 |

Missense and nonsense variants in the *PEX26* gene investigated in this study and the related biochemical and clinical phenotypes. \*PEX6 binding determined by co-immunoprecipitation (Furuki et al., 2006), †import of peroxisomal catalase at 37°C (Matsumoto et al., 2003). ‡Reported genotypes and clinical phenotypes associated with variants in *PEX26* (Matsumoto et al., 2003; Steinberg et al., 2004; Weller et al., 2005; Furuki et al., 2006). IRD, infantile Refsum disease; NALD, neonatal adrenoleukodystrophy; ZS, Zellweger syndrome.

**Supplementary Table 2. Library of genes encoding peroxisomal proteins.**

| Gene ID        | Isoform 1  | Isoform 2  |
|----------------|------------|------------|
| <i>ABCD1</i>   | BC015541.1 |            |
| <i>ABCD2</i>   | BC104903.1 |            |
| <i>ABCD3</i>   | BC009712.2 |            |
| <i>ABCD4</i>   | BC012815.2 |            |
| <i>ACAA1</i>   | BC011977.1 | BC014474.1 |
| <i>ACAD11</i>  | BC125204.1 |            |
| <i>ACBD5</i>   | BC030555.1 |            |
| <i>ACOT1</i>   | BC132891.1 |            |
| <i>ACOT2</i>   | BC006335.1 | AY005822.1 |
| <i>ACOT4</i>   | BC117343.1 |            |
| <i>ACOX1</i>   | BC010425.1 |            |
| <i>ACOX2</i>   | BC047700.1 |            |
| <i>ACOX3</i>   | BC017053.1 |            |
| <i>ACSF3</i>   | BC072391.1 |            |
| <i>ACSL4</i>   | BC034959.2 |            |
| <i>ACSL5</i>   | BC007985.2 |            |
| <i>ACSL6</i>   | BC047453.1 |            |
| <i>AGPS</i>    | BC141820.1 |            |
| <i>AGXT</i>    | BC132819.1 |            |
| <i>ALDH3A2</i> | BC002430.2 |            |
| <i>AMACR</i>   | BC009471.1 |            |
| <i>BAAT</i>    | BC009567.1 |            |
| <i>CAT</i>     | BC112217.1 |            |
| <i>CRAT</i>    | BC000723.2 |            |
| <i>CROT</i>    | BC039004.1 |            |
| <i>DAO</i>     | BC029057.1 |            |
| <i>DDO</i>     | BC032786.1 |            |
| <i>DECR2</i>   | BC010740.1 |            |
| <i>DHRS4</i>   | BC003019.1 |            |
| <i>DNAJC10</i> | BC117299.1 |            |
| <i>DNM1L</i>   | BC024590.1 |            |

|                 |                |             |
|-----------------|----------------|-------------|
| <i>ECH1</i>     | BC011792.2     |             |
| <i>EHHADH</i>   | BC038948.1     |             |
| <i>EPHX2</i>    | BC007708.2     |             |
| <i>FAR1</i>     | BC017377.2     |             |
| <i>FAR2</i>     | BC022267.1     |             |
| <i>FIS1</i>     | BC003540.1     |             |
| <i>FNDC5</i>    | BC062297.1     |             |
| <i>GNPAT</i>    | BC000450.2     |             |
| <i>GSTK1</i>    | AL136938.1     | BC063425.1  |
| <i>HACL1</i>    | BC001627.1     |             |
| <i>HAO1</i>     | BC113665.1     |             |
| <i>HAO2</i>     | BC020863.1     |             |
| <i>HMGCL</i>    | BC010570.1     |             |
| <i>HSD17B4</i>  | BC003098.1     |             |
| <i>IDH1</i>     | BC012846.1     |             |
| <i>IDI1</i>     | BC019227.2     |             |
| <i>IDI2</i>     | BC017778.1     |             |
| <i>MFF</i>      | BC093024.1     |             |
| <i>MLYCD</i>    | BC052592.1     |             |
| <i>MOSC2</i>    | BC011973.1     |             |
| <i>MPV17</i>    | BC001115.2     |             |
| <i>MPV17L2</i>  | BC005064.1     |             |
| <i>MVK</i>      | BC016140.1     |             |
| <i>NOS2</i>     | BC130283.1     |             |
| <i>NUDT12</i>   | BC041099.1     |             |
| <i>PECI</i>     | BC002668.2     |             |
| <i>PEX1</i>     | BC035575.1     |             |
| <i>PEX10</i>    | BC000543.2     | NM_002617.3 |
| <i>PEX11A</i>   | BC009697.1     |             |
| <i>PEX11B</i>   | BC011963.1     |             |
| <i>PEX11G</i>   | BC008780.2     |             |
| <i>PEX12</i>    | BC031085.1     |             |
| <i>PEX13</i>    | BC067090.1     |             |
| <i>PEX14</i>    | BC006327.2     |             |
| <i>PEX16</i>    | BC004356.1     |             |
| <i>PEX19</i>    | DQ894591.2     |             |
| <i>PEX2</i>     | BC005375.1     |             |
| <i>PEX26</i>    | NM_001127649.1 |             |
| <i>PEX3</i>     | BC015506.1     |             |
| <i>PEX5</i>     | NM_001131025.1 |             |
| <i>PEX6</i>     | BC048331.1     |             |
| <i>PEX7</i>     | BC031606.1     |             |
| <i>PHYH</i>     | BC029512.1     |             |
| <i>PIPOX</i>    | BC008960.2     |             |
| <i>PMVK</i>     | BC006089.1     |             |
| <i>PRDX1</i>    | BC007063.1     |             |
| <i>PRDX5</i>    | BC113725.1     |             |
| <i>PXMP2</i>    | BC073997.1     |             |
| <i>PXMP4</i>    | BC001147.1     |             |
| <i>PXT1</i>     | BC107049.2     |             |
| <i>RHOC</i>     | BC007245.1     |             |
| <i>SCP2</i>     | BC005911.1     | BC067108.1  |
| <i>SLC22A5</i>  | BC012325.1     |             |
| <i>SLC25A17</i> | BC005957.1     |             |
| <i>SLC27A2</i>  | BC057770.1     |             |
| <i>SOD1</i>     | BC001034.1     |             |
| <i>SOD2</i>     | BC012423.1     | BC016934.1  |
| <i>TMEM135</i>  | BC051462.1     |             |
| <i>TRIM37</i>   | BC036012.1     |             |
| <i>ZADH2</i>    | BC033780.1     |             |

Peroxisomal protein library covering 88% of all proteins annotated with peroxisomal localization. All proteins were analyzed for interaction with PEX26 in a BRET-based PPI-screen. For 6 out of the 90 proteins, 2 isoforms were analyzed.

### Supplementary Table 3. Results from OMIM database research and analysis.

| Source | Target | Type | OMIM   | Alternate Name                          |
|--------|--------|------|--------|-----------------------------------------|
| ACOX1  | ACOXX  | dg   | 264470 | PEROXISOMAL ACYL-CoA OXIDASE DEFICIENCY |
| ABCD1  | ALD    | dg   | 300100 | ADRENOLEUKODYSTROPHY                    |
| AMACR  | AMACRD | dg   | 614307 | ALPHA-METHYLACYL-CoARACEMASE DEFICIENCY |
| PEX7   | ARD1   | dg   | 614879 | REFSUM DISEASE, ADULT, 2                |
| PHYH   | ARD2   | dg   | 266500 | REFSUM DISEASE, ADULT, 1                |

|         |        |    |        |                                                                                |
|---------|--------|----|--------|--------------------------------------------------------------------------------|
| AMACR   | CBAS4  | dg | 214950 | BILE ACID SYNTHESIS DEFECT, CONGENITAL, 4                                      |
| NSDHL   | CHILDS | dg | 308050 | CONGENITAL HEMIDYSPLASIA WITH ICHTHYOSIFORM ERYTHRODERMA AND LIMB DEFECTS      |
| HSD17B4 | DBPX   | dg | 261515 | PEROXISOMAL BIFUNCTIONAL ENZYME DEFICIENCY                                     |
| DNM1L   | EMPF   | dg | 614388 | ENCEPHALOPATHY, LETHAL, DUE TO DEFECTIVE MITOCHONDRIAL AND PEROXISOMAL FISSION |
| C7orf10 | GA3    | dg | 231690 | GLUTARIC ACIDURIA III                                                          |
| AGXT    | HP1    | dg | 259900 | HYPEROXALURIA, PRIMARY, TYPE I                                                 |
| GUCY2D  | LCA1   | dg | 204000 | LEBER CONGENITAL AMAUROSIS 1                                                   |
| MLYCD   | MCDX   | dg | 248360 | MALONYL-CoA DECARBOXYLASE DEFICIENCY                                           |
| TRIM37  | MN     | dg | 253250 | MULIBREY NANISM                                                                |
| PEX1    | IRD    | dg | 601539 | INFANTILE REFSUM DISEASE                                                       |
| PEX12   | IRD    | dg | 266510 | INFANTILE REFSUM DISEASE                                                       |
| PEX16   | IRD    | dg | 614877 | INFANTILE REFSUM DISEASE                                                       |
| PEX26   | IRD    | dg | 614873 | INFANTILE REFSUM DISEASE                                                       |
| PEX5    | IRD    | dg | 202370 | INFANTILE REFSUM DISEASE                                                       |
| PEX6    | IRD    | dg | 614863 | INFANTILE REFSUM DISEASE                                                       |
| PXMP3   | IRD    | dg | 614867 | INFANTILE REFSUM DISEASE                                                       |
| PEX1    | NALD   | dg | 601539 | NEONATAL ADRENOLEUKODYSTROPHY                                                  |
| PEX10   | NALD   | dg | 614871 | NEONATAL ADRENOLEUKODYSTROPHY                                                  |
| PEX12   | NALD   | dg | 266510 | NEONATAL ADRENOLEUKODYSTROPHY                                                  |
| PEX13   | NALD   | dg | 614885 | NEONATAL ADRENOLEUKODYSTROPHY                                                  |
| PEX16   | NALD   | dg | 614877 | NEONATAL ADRENOLEUKODYSTROPHY                                                  |
| PEX26   | NALD   | dg | 614873 | NEONATAL ADRENOLEUKODYSTROPHY                                                  |
| PEX5    | NALD   | dg | 202370 | NEONATAL ADRENOLEUKODYSTROPHY                                                  |
| PEX6    | NALD   | dg | 614863 | NEONATAL ADRENOLEUKODYSTROPHY                                                  |
| PXMP3   | NALD   | dg | 614867 | NEONATAL ADRENOLEUKODYSTROPHY                                                  |
| NPC1    | NPC    | dg | 257220 | NIEMANN-PICK DISEASE, TYPE C1                                                  |
| PEX11B  | PDX    | dg | 614920 | PEROXISOME DIVISION DEFICIENCY                                                 |
| HSD17B4 | PRLTS1 | dg | 233400 | PERRAULT SYNDROME 1                                                            |
| PEX7    | RCDP1  | dg | 215100 | RHIZOMELIC CHONDRODYSPLASIA PUNCTATA, TYPE 1                                   |
| GNPAT   | RCDP2  | dg | 222765 | RHIZOMELIC CHONDRODYSPLASIA PUNCTATA, TYPE 2                                   |
| AGPS    | RCDP3  | dg | 600121 | RHIZOMELIC CHONDRODYSPLASIA PUNCTATA, TYPE 3                                   |
| SCP2    | SCPX   | dg | 613724 | LEUKOENCEPHALOPATHY WITH DYSTONIA AND MOTOR NEUROPATHY                         |
| PEX1    | ZS     | dg | 214100 | ZELLWEGER SYNDROME                                                             |
| PEX10   | ZS     | dg | 614870 | ZELLWEGER SYNDROME                                                             |
| PEX12   | ZS     | dg | 614859 | ZELLWEGER SYNDROME                                                             |
| PEX13   | ZS     | dg | 614883 | ZELLWEGER SYNDROME                                                             |
| PEX14   | ZS     | dg | 614887 | ZELLWEGER SYNDROME                                                             |
| PEX16   | ZS     | dg | 614876 | ZELLWEGER SYNDROME                                                             |
| PEX19   | ZS     | dg | 614886 | ZELLWEGER SYNDROME                                                             |
| PEX26   | ZS     | dg | 614872 | ZELLWEGER SYNDROME                                                             |
| PEX3    | ZS     | dg | 614882 | ZELLWEGER SYNDROME                                                             |
| PEX5    | ZS     | dg | 214110 | ZELLWEGER SYNDROME                                                             |
| PEX6    | ZS     | dg | 614862 | ZELLWEGER SYNDROME                                                             |
| PXMP3   | ZS     | dg | 614866 | ZELLWEGER SYNDROME                                                             |
| ALDH3A2 | SLS    | dg | 270200 | SJOGREN-LARSSON SYNDROME                                                       |
| MPV17   | MTDPS6 | dg | 256810 | MITOCHONDRIAL DNA DEPLETION SYNDROME 6                                         |
| ERBB2   | GLM1   | dg | 137800 | GLIOMA SUSCEPTIBILITY 1                                                        |
| HMGCL   | HMGCLD | dg | 246450 | 3-HYDROXY-3-METHYLGLUTARYL-CoA LYASE DEFICIENCY                                |
| ACSL4   | MRX63  | dg | 300387 | MENTAL RETARDATION, X-LINKED 63                                                |
| MVK     | HIDS   | dg | 260920 | HYPER-IgD SYNDROME                                                             |
| MVK     | POROK3 | dg | 175900 | POROKERATOSIS 3, DISSEMINATED SUPERFICIAL ACTINIC TYPE                         |
| MVK     | MEVA   | dg | 610377 | MEVALONIC ACIDURIA                                                             |
| ACSF3   | CMAMMA | dg | 614265 | COMBINED MALONIC AND METHYLMALONIC ACIDURIA                                    |
| BAAT    | FHCA   | dg | 607748 | HYPERCHOLANEMIA, FAMILIAL                                                      |
| SLC22A5 | CDSP   | dg | 212140 | CARNITINE DEFICIENCY, SYSTEMIC PRIMARY                                         |
| ABCD4   | MAHJC  | dg | 614857 | METHYLMALONIC ACIDURIA AND HOMOCYSTINURIA, cblJ TYPE                           |
| EPHX2   | FHC    | dg | 143890 | HYPERCHOLESTEROLEMIA, FAMILIAL                                                 |
| DNM1L   | EMPF   | dg | 614388 | DEFECTIVE MITOCHONDRIAL AND PEROXISOMAL FISSION                                |
| DAO     | SCZD   | dg | 181500 | SCHIZOPHRENIA                                                                  |
| CAT     | CATD   | dg | 115500 | ACATALASEMIA                                                                   |
| AMACRD  | CBAS4  | dd |        |                                                                                |
| RCDP1   | ARD1   | dd |        |                                                                                |
| DBPX    | PRLTS1 | dd |        |                                                                                |
| NALD    | ZS     | dd |        |                                                                                |

|         |        |    |
|---------|--------|----|
| IRD     | ZS     | dd |
| NALD    | IRD    | dd |
| POROK3  | MEVA   | dd |
| HIDS    | MEVA   | dd |
| POROK3  | HIDS   | dd |
| ABCD1   | ABCD1  | pp |
| ABCD1   | ABCD2  | pp |
| ABCD1   | ABCD3  | pp |
| ABCD1   | PEX19  | pp |
| ABCD1   | PEX26  | pp |
| ABCD2   | ABCD2  | pp |
| ABCD2   | ABCD3  | pp |
| ABCD2   | PEX19  | pp |
| ABCD3   | ABCD3  | pp |
| ABCD3   | PEX19  | pp |
| ABCD3   | PEX26  | pp |
| ACBD5   | PEX26  | pp |
| ACOX1   | SCP2   | pp |
| ACSL6   | PHYH   | pp |
| AGPS    | GNPAT  | pp |
| AGXT    | PEX5   | pp |
| ALDH3A2 | PEX26  | pp |
| ASNA1   | ASNA1  | pp |
| CAT     | CAT    | pp |
| CAT     | PEX5   | pp |
| DAO     | DAO    | pp |
| DDO     | PEX5   | pp |
| DECR2   | PEX19  | pp |
| DNM1L   | FIS1   | pp |
| DNM1L   | PEX11A | pp |
| DNM1L   | PEX11B | pp |
| DNM1L   | PEX11G | pp |
| ECH1    | PEX26  | pp |
| EHHADH  | SCP2   | pp |
| 2       |        |    |
| FAR1    | PEX26  | pp |
| FIS1    | FIS1   | pp |
| FIS1    | PEX11A | pp |
| FIS1    | PEX11B | pp |
| FIS1    | PEX11G | pp |
| FIS1    | PEX26  | pp |
| HACL1   | HACL1  | pp |
| MVK     | MVK    | pp |
| PEX1    | PEX6   | pp |
| PEX10   | PEX10  | pp |
| PEX10   | PEX12  | pp |
| PEX10   | PEX19  | pp |
| PEX10   | PEX5   | pp |
| PEX10   | PXMP3  | pp |
| PEX11A  | PEX11A | pp |
| PEX11A  | PEX11G | pp |
| PEX11A  | PEX19  | pp |
| PEX11B  | PEX11B | pp |
| PEX11B  | PEX11G | pp |
| PEX11B  | PEX19  | pp |
| PEX11B  | PEX26  | pp |
| PEX11G  | PEX11G | pp |
| PEX11G  | PEX26  | pp |
| PEX12   | PEX19  | pp |
| PEX12   | PEX26  | pp |
| PEX12   | PEX5   | pp |
| PEX13   | PEX13  | pp |
| PEX13   | PEX14  | pp |
| PEX13   | PEX19  | pp |
| PEX13   | PEX26  | pp |
| PEX13   | PEX5   | pp |
| PEX13   | PEX7   | pp |

|        |          |    |
|--------|----------|----|
| PEX14  | PEX14    | pp |
| PEX14  | PEX19    | pp |
| PEX14  | PEX26    | pp |
| PEX14  | PEX5     | pp |
| PEX14  | PEX7     | pp |
| PEX16  | PEX19    | pp |
| PEX16  | PEX26    | pp |
| PEX19  | PEX26    | pp |
| PEX19  | PEX3     | pp |
| PEX19  | PXMP4    | pp |
| PEX19  | SLC25A17 | pp |
| PEX26  | PEX11B   | pp |
| PEX5   | PEX26    | pp |
| PEX5   | PEX7     | pp |
| PEX5   | SCP2     | pp |
| PEX6   | PEX26    | pp |
| PEX7   | PHYH     | pp |
| PHYH   | PHYH     | pp |
| PRDX1  | PRDX1    | pp |
| PXMP2  | PEX26    | pp |
| PXMP4  | PEX26    | pp |
| SOD1   | SOD1     | pp |
| SOD1   | SOD2     | pp |
| TRIM37 | TRIM37   | pp |
| AMACRD | CBAS4    | dd |
| RCDP1  | ARD1     | dd |
| DBPX   | PRLTS1   | dd |
| NALD   | ZS       | dd |
| IRD    | ZS       | dd |
| NALD   | IRD      | dd |
| POROK3 | MEVA     | dd |
| HIDS   | MEVA     | dd |
| POROK3 | HIDS     | dd |

**Supplementary Table 4. Binary PPI matrix of edgetic perturbations.**

|         | WT | <i>p</i> .Leu153Val | <i>p</i> .Leu44Pro | <i>p</i> .Leu45Pro | <i>p</i> .Pro118Arg | <i>p</i> .Gly89Arg | <i>p</i> .Arg98Trp | <i>p</i> .Pro117Leu |
|---------|----|---------------------|--------------------|--------------------|---------------------|--------------------|--------------------|---------------------|
| ABCD1   | 1  | 1                   | 1                  | 1                  | 0                   | 0                  | 0                  | 0                   |
| ABCD3   | 1  | 0                   | 0                  | 0                  | 0                   | 0                  | 0                  | 0                   |
| ACBD5   | 1  | 0                   | 0                  | 0                  | 0                   | 0                  | 0                  | 0                   |
| ALDH3A2 | 1  | 1                   | 1                  | 1                  | 1                   | 0                  | 0                  | 1                   |
| ECH1    | 1  | 1                   | 1                  | 1                  | 1                   | 1                  | 1                  | 1                   |
| FAR1    | 1  | 1                   | 0                  | 0                  | 0                   | 0                  | 0                  | 0                   |
| FIS     | 1  | 1                   | 1                  | 1                  | 1                   | 1                  | 1                  | 1                   |
| PEX11B  | 1  | 1                   | 0                  | 0                  | 0                   | 0                  | 0                  | 0                   |
| PEX11G  | 1  | 1                   | 1                  | 1                  | 1                   | 1                  | 1                  | 0                   |
| PEX12   | 1  | 1                   | 1                  | 1                  | 1                   | 1                  | 1                  | 0                   |
| PEX13   | 1  | 1                   | 0                  | 1                  | 0                   | 0                  | 0                  | 0                   |
| PEX14   | 1  | 1                   | 1                  | 1                  | 1                   | 1                  | 1                  | 1                   |
| PEX16   | 1  | 0                   | 0                  | 0                  | 0                   | 0                  | 0                  | 0                   |
| PEX19   | 1  | 1                   | 1                  | 1                  | 1                   | 1                  | 1                  | 1                   |
| PEX5    | 1  | 1                   | 1                  | 1                  | 1                   | 1                  | 1                  | 1                   |
| PEX6    | 1  | 1                   | 0                  | 0                  | 0                   | 0                  | 0                  | 0                   |
| PXMP2   | 1  | 1                   | 1                  | 1                  | 1                   | 1                  | 1                  | 1                   |
| PXMP4   | 1  | 0                   | 1                  | 1                  | 1                   | 1                  | 1                  | 1                   |

Matrix of PPI for WT and variant PEX26 with proteins interacting with WT PEX26. Positive interactions were classified as 1, non-interacting was classified as 0.

**Supplementary Table 5. Network analysis of the PEX26 associated peroxisomal interactom.**

|                    | Clustering coefficient | Connected components | Network centrality | Average number of neighbours | Number of nodes | Network density | Network heterogeneity | Isolated nodes | Number of edges |
|--------------------|------------------------|----------------------|--------------------|------------------------------|-----------------|-----------------|-----------------------|----------------|-----------------|
| WT                 | 0.273                  | 57                   | 0.429              | 3.405                        | 37              | 0.095           | 1.087                 | 0              | 74              |
| <i>p.Leu153Val</i> | 0.215                  | 58                   | 0.347              | 3.189                        | 37              | 0.089           | 1.054                 | 1              | 70              |
| <i>p.Leu44Pro</i>  | 0.229                  | 60                   | 0.352              | 3.027                        | 37              | 0.084           | 1.032                 | 2              | 67              |
| <i>p.Leu45Pro</i>  | 0.234                  | 60                   | 0.350              | 3.081                        | 37              | 0.086           | 1.041                 | 2              | 68              |
| <i>p.Pro118Arg</i> | 0.229                  | 60                   | 0.353              | 2.973                        | 37              | 0.083           | 1.027                 | 2              | 66              |
| <i>p.Gly89Arg</i>  | 0.230                  | 61                   | 0.355              | 2.919                        | 37              | 0.081           | 1.034                 | 3              | 65              |
| <i>p.Arg98Trp</i>  | 0.230                  | 61                   | 0.355              | 2.919                        | 37              | 0.081           | 1.034                 | 3              | 65              |
| <i>p.Pro117Leu</i> | 0.231                  | 60                   | 0.356              | 2.865                        | 37              | 0.08            | 1.021                 | 2              | 64              |
| <i>p.Met1Thr</i>   | 0.274                  | 60                   | 0.345              | 3.243                        | 37              | 0.09            | 1.067                 | 2              | 71              |
| <i>p.Trp99Ter</i>  | 0.203                  | 61                   | 0.333              | 2.649                        | 37              | 0.074           | 1.006                 | 4              | 60              |
| <i>p.Arg192Ter</i> | 0.203                  | 61                   | 0.333              | 2.649                        | 37              | 0.074           | 1.006                 | 4              | 60              |
| Node removal       | 0.217                  | 63                   | 0.348              | 2.500                        | 36              | 0.071           | 1.073                 | 5              | 56              |

Parameters of network analysis are given for the peroxisomal network comprising PPI identified in this study merged with a dataset of known peroxisomal PPI that are directly or indirectly associated to the PEX26 network. Data are given for the network in dependence of variants in PEX26.

**Supplementary Table 6. Correlation of edgetic perturbations to phenotypic parameters.**

|                              | Number of PPI   | Protein amount | Matrix protein import (37°C) |       |       | Biochemical score |
|------------------------------|-----------------|----------------|------------------------------|-------|-------|-------------------|
|                              |                 |                | Catalase                     | PTS1  | PTS2  |                   |
| WT                           | 18              | 30             | 10                           | 10    | 10    | 60                |
| <i>p.Leu153Val</i>           | 14              | 15             | 7                            | 8     | 10    | 40                |
| <i>p.Leu44Pro</i>            | 12              | 30             | 0                            | 0     | 0     | 30                |
| <i>p.Leu45Pro</i>            | 12              | 30             | 0                            | 0     | 0     | 30                |
| <i>p.Pro118Arg</i>           | 10              | n.a.           | n.a.                         | n.a.  | n.a.  | n.a.              |
| <i>p.Gly89Arg</i>            | 10              | 15             | 0                            | 0.5   | 0     | 15.5              |
| <i>p.Arg98Trp</i>            | 10              | 15             | 2                            | 7     | 7     | 31                |
| <i>p.Pro117Leu</i>           | 9               | 15             | 0                            | 2     | 1     | 18                |
| Correlation to number of PPI | Pearson r       | 0.56           | 0.89                         | 0.65  | 0.67  | 0.95              |
|                              | <i>P</i> -value | 0.187          | 0.008                        | 0.115 | 0.102 | 0.001             |

Number of protein-protein interactions (PPI) derived from BRET experiments are depicted for each variant and WT PEX26. The biochemical score is weighted 30-10-10-10-10 with respect to protein amount (Furuki et al., 2006), catalase import, PTS1-dependent import, and PTS2 dependent import to yield a total of 60 for WT PEX26. For the protein amount, a value of 30 reflects a protein stability comparable to the WT PEX26 and a score of 15 reflects reduced but residual protein stability. For peroxisomal matrix protein import (Matsumoto et al., 2003) a score of 10 corresponds to 100% of matrix protein import.



## SUPPLEMENTARY REFERENCES

- Furuki, S., Tamura, S., Matsumoto, N., Miyata, N., Moser, A., Moser, H.W., et al. (2006). Mutations in the peroxin Pex26p responsible for peroxisome biogenesis disorders of complementation group 8 impair its stability, peroxisomal localization, and interaction with the Pex1p x Pex6p complex. *J Biol Chem* 281, 1317-1323.
- Gersting, S.W., Lotz-Havla, A.S., and Muntau, A.C. (2012). Bioluminescence resonance energy transfer: an emerging tool for the detection of protein-protein interaction in living cells. *Methods Mol Biol* 815, 253-263.
- Hamdan, F.F., Percherancier, Y., Breton, B., and Bouvier, M. (2006). Monitoring protein-protein interactions in living cells by bioluminescence resonance energy transfer (BRET). *Curr Protoc Neurosci* Chapter 5, Unit 5 23.
- Hillebrand, M., Gersting, S.W., Lotz-Havla, A.S., Schaefer, A., Rosewich, H., Valerius, O., et al. (2011). Identification of a new fatty acid synthesis-transport machinery at the peroxisomal membrane. *J Biol Chem*.
- Matsumoto, N., Tamura, S., Furuki, S., Miyata, N., Moser, A., Shimozawa, N., et al. (2003). Mutations in novel peroxin gene PEX26 that cause peroxisome-biogenesis disorders of complementation group 8 provide a genotype-phenotype correlation. *Am J Hum Genet* 73, 233-246.
- Smoot, M.E., Ono, K., Ruscheinski, J., Wang, P.L., and Ideker, T. (2011). Cytoscape 2.8: new features for data integration and network visualization. *Bioinformatics* 27, 431-432.
- Steinberg, S., Chen, L., Wei, L., Moser, A., Moser, H., Cutting, G., et al. (2004). The PEX Gene Screen: molecular diagnosis of peroxisome biogenesis disorders in the Zellweger syndrome spectrum. *Mol Genet Metab* 83, 252-263.
- Weller, S., Cajigas, I., Morrell, J., Obie, C., Steel, G., Gould, S.J., et al. (2005). Alternative splicing suggests extended function of PEX26 in peroxisome biogenesis. *Am J Hum Genet* 76, 987-1007.
